# Supplementary material for: High temperature synergistic response of magnetism, dielectricity, and luminescence in a Mn(ii)-based molecular organic–inorganic hybrid
Source: Royal Society of Chemistry journal article supplement (doi:10.1039/d3ce01278f), 2024-01-01
Supplement: d3ce01278f1.pdf [file d3ce01278f1.pdf]

## Supporting information

### High temperature Synergetic Response of Magnetism, Dielectricity and Luminescence in a Mn(II) based molecular organic-inorganic hybrid

Hai-Quan Yao,<sup>†1</sup> Zhenjun Ding,<sup>‡2</sup> Shi-Yong Zhang,<sup>3</sup> Yan-Fang Wu,<sup>2</sup> Xin Qiu,<sup>\*4</sup> Yan Peng,<sup>\*1,5</sup> Heng-Yun Ye,<sup>1</sup> and Zhao-Bo Hu<sup>\*1,5</sup>

#### Experimental section

The materials used are commercially available and without further purification.

##### Synthesis of (TPA)<sub>2</sub>MnBr<sub>4</sub>:

TPA (0.53 g, 2 mmol) and MnBr<sub>2</sub>·4H<sub>2</sub>O (0.28 g, 1mmol) were dissolved in 4 mL HBr solution and stirred for 5 min to obtain a clear solution. The mixture was slowly volatilized at room temperature. Flake green single crystals were obtained after several days. The single crystals were filtered and dry at 50 °C in oven. Polycrystalline samples are prepared by grinding dry crystals into powder. The purity was verified by powder X-ray diffraction (PXRD) spectra. The IR spectrum of compound **1** is shown in the Fig. S1. IR data (KBr, cm<sup>-1</sup>): 3838(m), 3730(m), 3550(w), 3475(w), 3417(w), 3973(s), 3878(w), 1620(m), 1467(s), 1382(w), 1324(m), 1268(m), 1174(m), 1107(m), 1041(m), 976(s), 920(m), 850(m), 756(s), 621(m), 473(m).

##### Single-crystal diffraction.

Single crystal structure at low temperature and unit cell at high temperature were measured by using Mo-K $\alpha$  radiation ( $\lambda = 0.71073 \text{ \AA}$ ) on the XtLAB Synergy R, HyPix single crystal diffractometer. We collected the low temperature single crystal structure of compound **1**. The structure of the compound was solved by the direct method and then refined by SHELXLTL software through the full-matrix least-squares refinements based on  $F^2$ . Anisotropic refinement was performed on all non-hydrogen atoms by using all reflections of  $I > 2\sigma(I)$ . All hydrogen atoms were obtained geometrically.

##### Differential scanning calorimetry (DSC).

DSC measurements of compounds were carried out with NETZSCH DSC 214 Polyma DSC21400A-1032-L instrument. The heating/cooling processes of the compound were carried out in a nitrogen environment at a rate of 20 K/min.

##### Dielectric measurements.

Dielectric constant ( $\epsilon = \epsilon' - i\epsilon''$ ) of compound **1** is tested by TH2828A variable temperature dielectric meter. The test frequency is 1 MHz and the applied voltage is 1.0 v.

##### Powder X-ray diffraction (PXRD).

The powder diffraction diagrams were measured by the Rigaku D/MAX diffractometer (Cu-K $\alpha = 1.54056 \text{ \AA}$ ).

##### TG measurements.

A Netzsch STA 449C device was used for thermogravimetry (TG) analysis, with a temperature range of 295–1050 K and a heating rate of 10 K min<sup>-1</sup>.

#### **Magnetic measurements.**

The DC susceptibilities of compound **1** were measured using Quantum Design SQUID-based MPMSXL-3-type magnetometer. Magnetic data of compound **1** were recorded in the temperature range of 2.0–430 K with a magnetic field of 1000 Oe. At the same time, in order to study the effect of phase transition on magnetism, the magnetic data changes during cooling and heating were recorded. The magnetization of compound **1** was recorded in field range of 0–7 T and temperature of 2 K.

#### **Photoluminescence spectroscopic measurements.**

The emission, excitation spectra and absolute quantum yields (QYs) of compound **1** were measured at room temperature using a fluorimeter (Edinburgh, FLS980) with a xenon flash lamp and an integrating sphere.

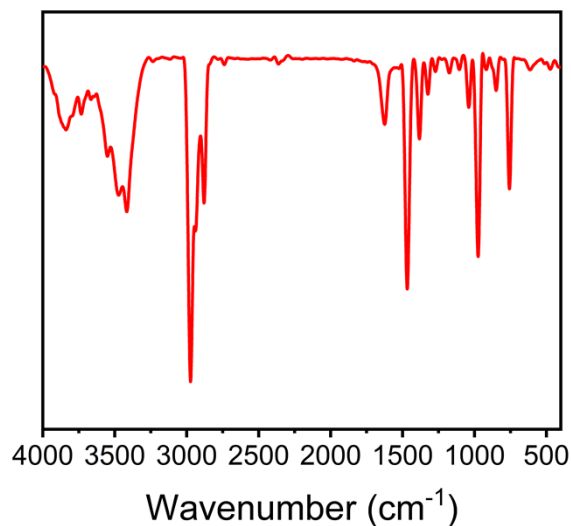

**Fig. S1.** IR spectra of compounds **1**.

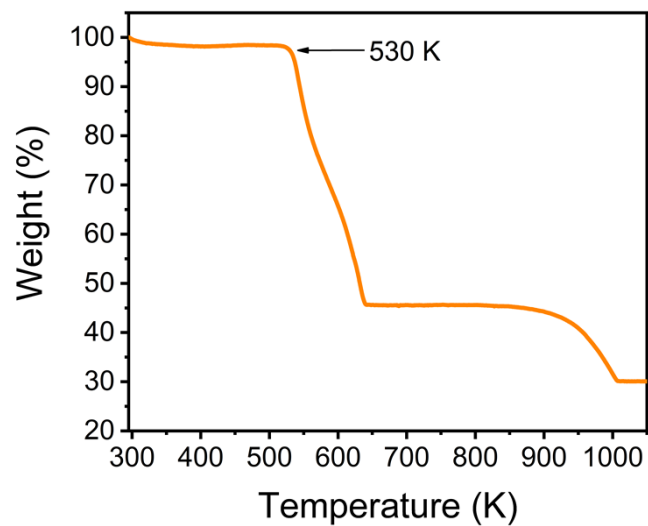

**Fig. S2.** TG analysis diagram of compound **1**.

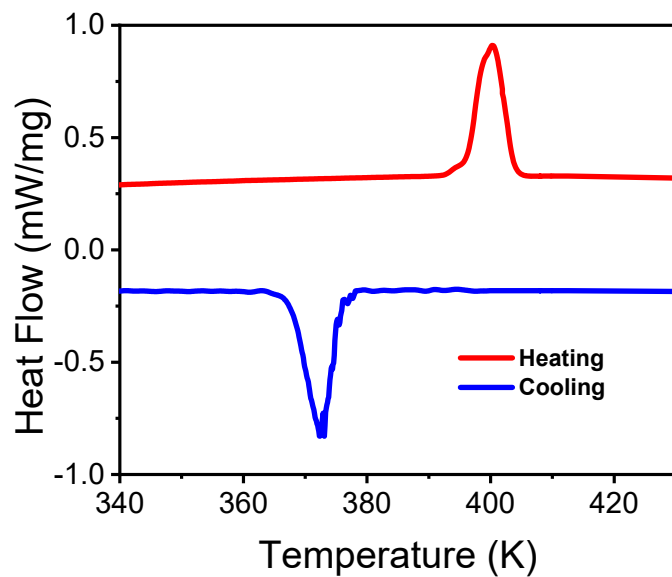

**Fig. S3.** DSC curves of compound **1** (The rate of change temperature is 5 K/min).

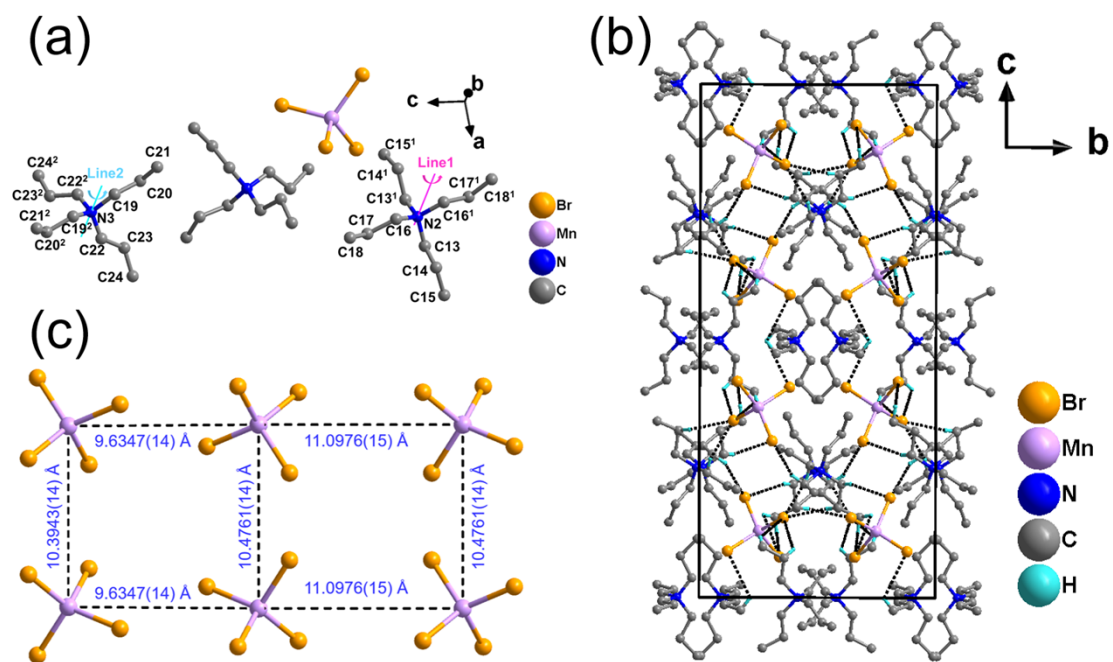

**Fig. S4.** (a) Molecular structure of compound **1**. (b) Packing picture of compound **1**. Black lines indicate hydrogen bonds. (c) The Mn-Mn distance of compound **1**.

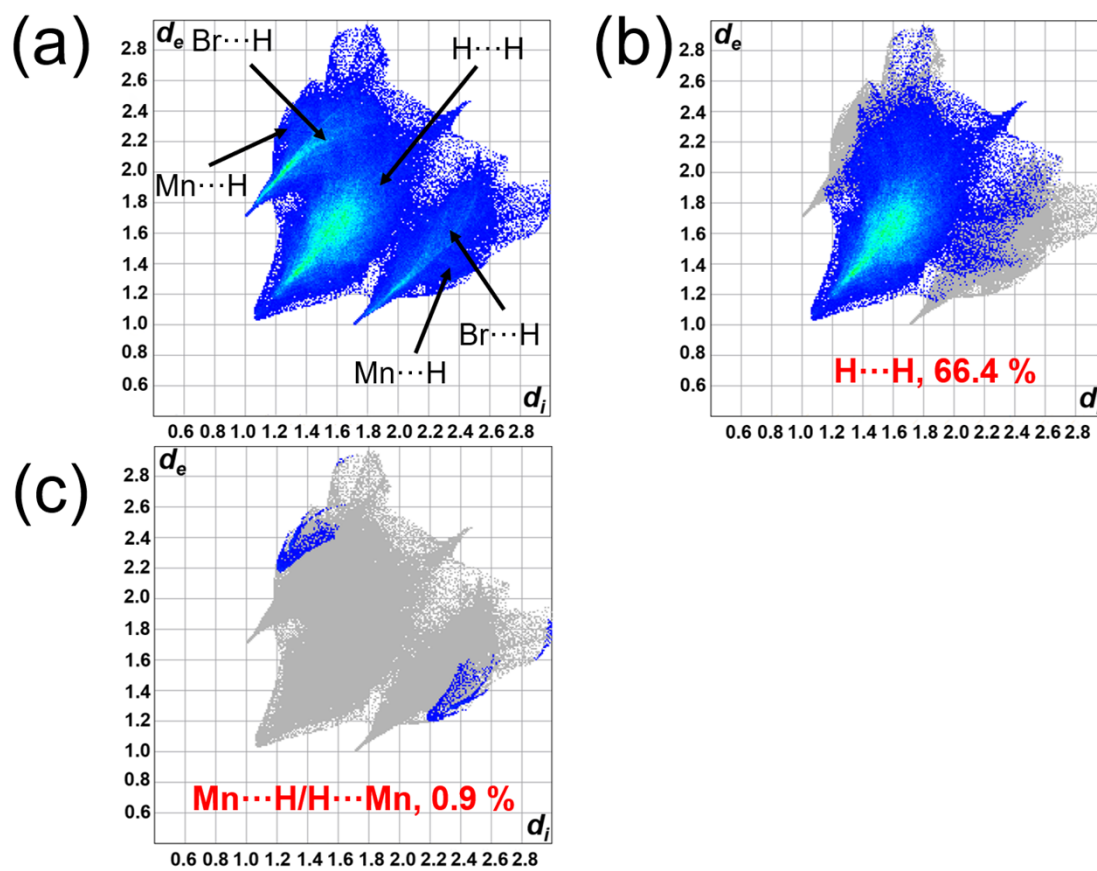

**Fig. S5.** (a) (b) (c) are plots of 2D-Fingerprint ( $d_e$  vs  $d_i$ ) of **1**.

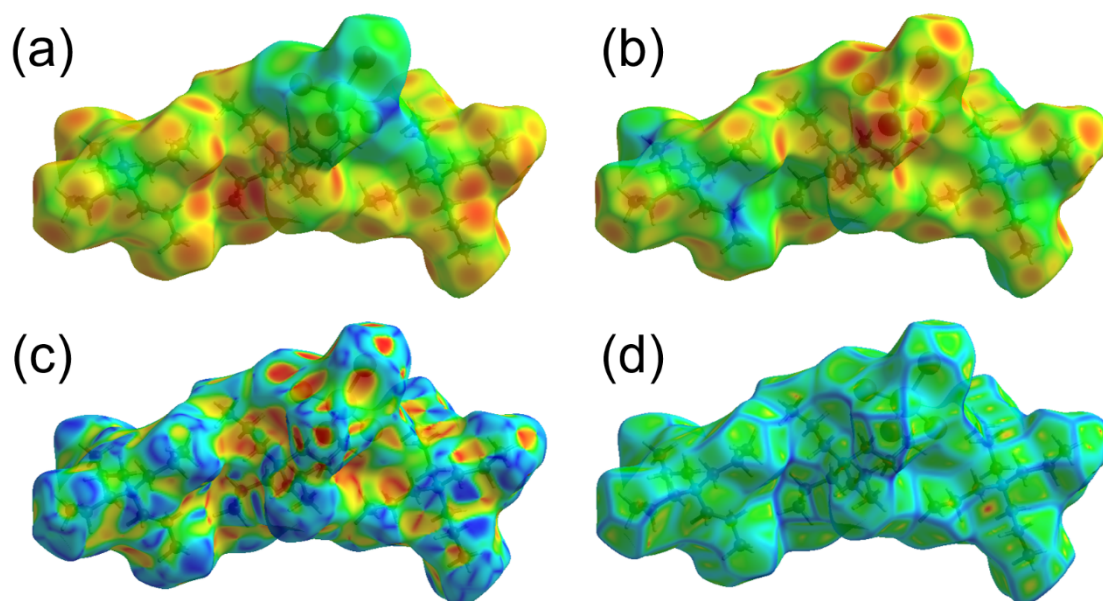

**Fig. S6** The 3D color mapping Hirshfeld surface analysis of **1** showing (a)  $d_i$ , (b)  $d_e$ , (c) shape index and (d) curvedness.

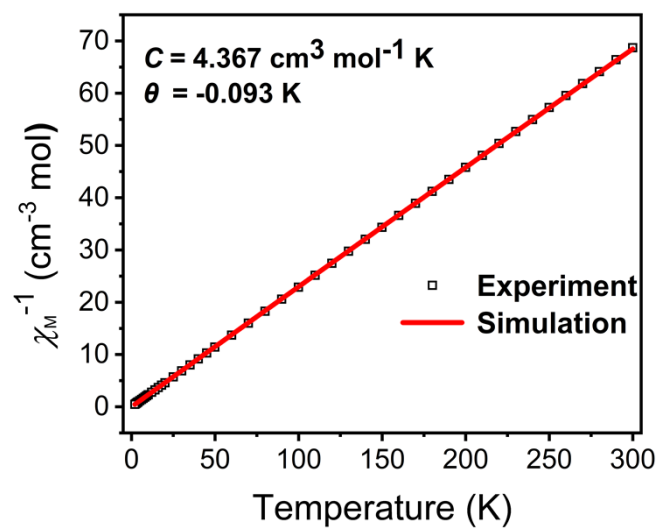

**Fig. S7** The temperature dependence curve of  $\chi_M^{-1}$  for compound **1**. The solid line represents the fitting by Curie-Weiss law.

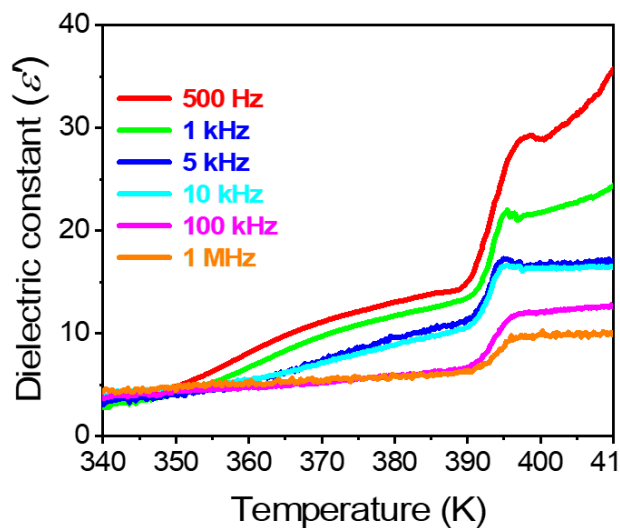

**Fig. S8** Plots of dielectric frequency dependence for **1**.

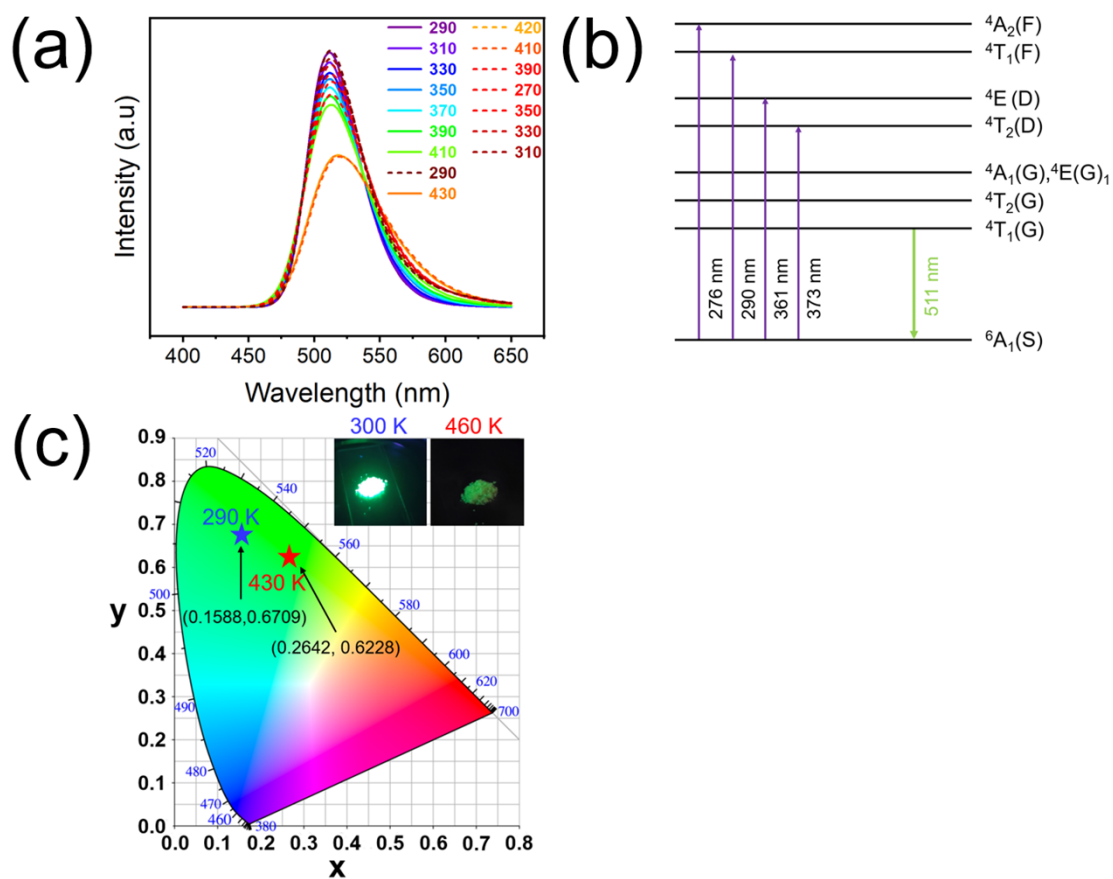

**Fig. S9** (a) Emission spectra at different temperatures; (b) Energy state splitting and optical transitions; (c) CIE chromaticity coordinate diagram at 290 K and 430 K for **1**.

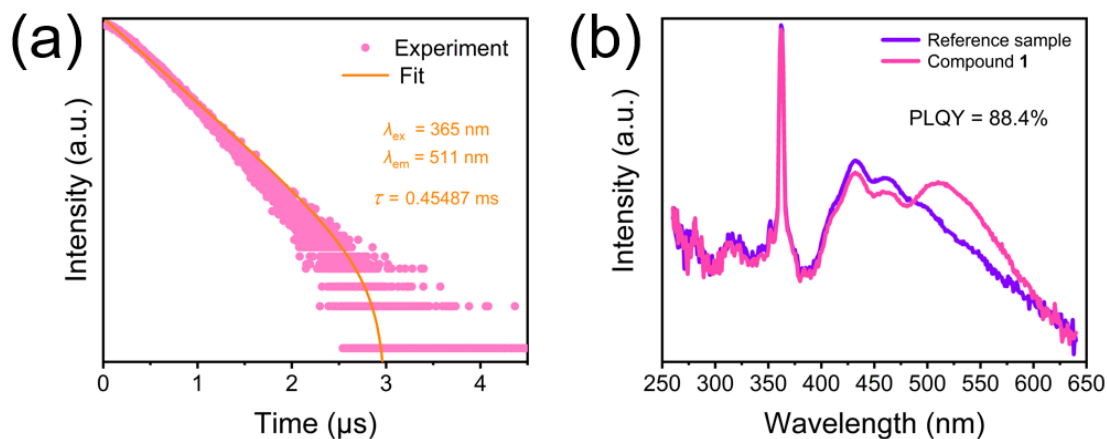

**Fig. S10.** (a) The fluorescence lifetime for **1** at room temperature. The solid line stands for linear

fit to the equation:  $I(t) = A_1 e^{-\frac{t}{\tau_1}} + I_0$ . (b) Quantum yield of compound **1** ( $\lambda_{\text{ex}} = 365 \text{ nm}$ ).

**Table S1.** Crystallographic data and structural refinement parameters for **1**

| Complex                                             | <b>1</b>                                                         |
|-----------------------------------------------------|------------------------------------------------------------------|
| Temperature (K)                                     | 298.57(10)                                                       |
| Chemical formula                                    | C <sub>24</sub> H <sub>56</sub> Br <sub>4</sub> MnN <sub>2</sub> |
| Formula weight                                      | 747.278                                                          |
| Crystal system                                      | monoclinic                                                       |
| Space group                                         | <i>I2/a</i>                                                      |
| <i>a</i> (Å)                                        | 15.1145(8)                                                       |
| <i>b</i> (Å)                                        | 14.3917(8)                                                       |
| <i>c</i> (Å)                                        | 31.3543(18)                                                      |
| $\alpha$ (°)                                        | 90                                                               |
| $\beta$ (°)                                         | 95.841(5)                                                        |
| $\gamma$ (°)                                        | 90                                                               |
| Volume (Å <sup>3</sup> )                            | 6784.9(7)                                                        |
| <i>Z</i>                                            | 8                                                                |
| Density (g/cm <sup>3</sup> )                        | 1.463                                                            |
| $\mu$ / mm <sup>-1</sup>                            | 5.113                                                            |
| <i>F</i> (000)                                      | 3029.6                                                           |
| 2 $\theta$ range (°)                                | 3.92 to 62.06                                                    |
| Reflections collected                               | 23313                                                            |
| <i>R</i> <sub>int</sub>                             | 0.0459                                                           |
| Goodness-of-fit on <i>F</i> <sup>2</sup>            | 0.978                                                            |
| Final <i>R</i> indexes [ <i>I</i> ≥ 2σ( <i>I</i> )] | <i>R</i> <sub>1</sub> = 0.0696, <i>wR</i> <sub>2</sub> = 0.1882  |
| Final <i>R</i> indexes [all data]                   | <i>R</i> <sub>1</sub> = 0.1613, <i>wR</i> <sub>2</sub> = 0.2292  |

**Table S2.** Bond lengths [Å] and angles [°] for **1**

| <b>1</b> |            |         |           |
|----------|------------|---------|-----------|
| Br1-Mn1  | 2.5281(12) | C10-C11 | 1.514(10) |

|                                       |            |                                       |           |
|---------------------------------------|------------|---------------------------------------|-----------|
| Br2-Mn1                               | 2.4972(13) | C4-C5                                 | 1.479(12) |
| Br3-Mn1                               | 2.5060(12) | C8-C9                                 | 1.503(11) |
| Br4-Mn1                               | 2.5257(14) | C16-C17                               | 1.534(10) |
| N2-C13 <sup>1</sup>                   | 1.516(8)   | C17-C18                               | 1.507(10) |
| N2-C13                                | 1.516(8)   | C14-C15                               | 1.512(11) |
| N2-C16                                | 1.511(8)   | C6-C5                                 | 1.509(12) |
| N2-C16 <sup>1</sup>                   | 1.511(8)   | C11-C12                               | 1.519(13) |
| N1-C1                                 | 1.515(8)   | N3-C22 <sup>2</sup>                   | 1.383(10) |
| N1-C7                                 | 1.539(8)   | N3-C22                                | 1.383(10) |
| N1-C10                                | 1.507(8)   | N3-C19                                | 1.497(12) |
| N1-C4                                 | 1.511(9)   | N3-C19 <sup>2</sup>                   | 1.497(12) |
| C1-C2                                 | 1.491(10)  | C24-C23                               | 1.393(14) |
| C13-C14                               | 1.519(10)  | C21-C20                               | 1.477(15) |
| C7-C8                                 | 1.517(11)  | C22-C23                               | 1.444(8)  |
| C2-C3                                 | 1.499(11)  | C20-C19                               | 1.445(9)  |
| Br2-Mn1-Br1                           | 109.31(5)  | C8-C7-N1                              | 116.8(6)  |
| Br3-Mn1-Br1                           | 109.62(4)  | C3-C2-C1                              | 111.4(7)  |
| Br3-Mn1-Br2                           | 108.06(5)  | C11-C10-N1                            | 115.6(6)  |
| Br4-Mn1-Br1                           | 112.79(5)  | C5-C4-N1                              | 118.2(7)  |
| Br4-Mn1-Br2                           | 106.95(5)  | C9-C8-C7                              | 109.7(7)  |
| Br4-Mn1-Br3                           | 109.97(5)  | C17-C16-N2                            | 116.1(6)  |
| C13-N2-C13 <sup>1</sup>               | 106.0(7)   | C18-C17-C16                           | 109.9(7)  |
| C16-N2-C13 <sup>1</sup>               | 111.3(4)   | C15-C14-C13                           | 110.1(7)  |
| C16-N2-C13                            | 111.0(4)   | C12 C11 C10                           | 109.0(8)  |
| C16 <sup>1</sup> -N2-C13 <sup>1</sup> | 111.0(4)   | C6-C5-C4                              | 111.0(8)  |
| C16 <sup>1</sup> -N2-C13              | 111.3(4)   | C22-N3-C22 <sup>2</sup>               | 119.9(13) |
| C16 <sup>1</sup> -N2-C16              | 106.4(7)   | C19 <sup>2</sup> -N3-C22 <sup>2</sup> | 111.3(6)  |
| C7-N1-C1                              | 107.2(5)   | C19 <sup>2</sup> -N3-C22              | 106.8(7)  |
| C10-N1-C1                             | 108.8(5)   | C19-N3-C22 <sup>2</sup>               | 106.8(7)  |
| C10-N1-C7                             | 110.5(5)   | C19-N3-C22                            | 111.3(6)  |
| C4-N1-C1                              | 111.8(5)   | C19-N3-C19 <sup>2</sup>               | 98.8(11)  |
| C4-N1-C7                              | 109.2(5)   | C23-C22-N3 <sup>2</sup>               | 133.7(10) |
| C4-N1-C10                             | 109.2(5)   | C22-C23-C24                           | 126.6(11) |
| C2-C1-N1                              | 118.1(6)   | C19-C20-C21                           | 111.6(11) |
| C14-C13-N2 <sup>1</sup>               | 115.0(6)   | C20-C19-N3 <sup>2</sup>               | 133.4(11) |

Symmetry codes: <sup>1</sup>3/2 - x, +y, -z; <sup>2</sup>3/2-x, +y, 1-z.

**Table S3.** Bond lengths [Å] and bond angles [°] of the hydrogen bond in **1** at 298 K

| D-H...A                     | d(D-H)/Å | d(H-A)/Å  | d(D-A)/Å  | D-H-A/°    |
|-----------------------------|----------|-----------|-----------|------------|
| C1-H1a...Br2 <sup>1</sup>   | 0.9700   | 2.824(7)  | 3.749(7)  | 159.69(14) |
| C7-H7a...Br4 <sup>2</sup>   | 0.9700   | 2.956(7)  | 3.840(7)  | 152.12(14) |
| C10-H10b...Br4              | 0.9700   | 3.067(7)  | 3.897(7)  | 144.43(14) |
| C8-H8a...Br2 <sup>1</sup>   | 0.9700   | 2.930(9)  | 3.835(9)  | 155.63(18) |
| C9-H9b...Br1 <sup>2</sup>   | 0.9600   | 3.50(6)   | 3.838(10) | 104(4)     |
| C9-H9c...Br1 <sup>2</sup>   | 0.9600   | 3.55(6)   | 3.838(10) | 100(4)     |
| C15-H15c...Br <sup>3</sup>  | 0.9600   | 3.35(5)   | 3.878(9)  | 117(4)     |
| C21-H21c...Br2 <sup>1</sup> | 0.9600   | 2.985(16) | 3.780(12) | 141.0(13)  |
| C20-H20b...Br2 <sup>1</sup> | 0.9700   | 3.078(15) | 3.815(15) | 133.9(2)   |



Symmetry codes:  $^13/2 - x, 1/2 - y, 1/2 - z$ ;  $^21-x, -1/2+y, 1/2-z$ ;  $^31/2+x, -y, +z$ .

**Table S4.** Hirshfeld surface analysis of **1**.

| Surface Property | Range(Å)        | Globularity | Asphericity | Volume (Å <sup>3</sup> ) | Area (Å <sup>2</sup> ) |
|------------------|-----------------|-------------|-------------|--------------------------|------------------------|
| $d_i$            | 1.0031- 3.1260  | 0.624       | 0.351       | 1162.87                  | 856.81                 |
| $d_e$            | 1.0037- 2.9812  | 0.624       | 0.351       | 1162.87                  | 856.81                 |
| $d_{norm}$       | -0.1522- 1.5863 | 0.624       | 0.351       | 1162.87                  | 856.81                 |
| Shape index      | -1.0000-1.0000  | 0.624       | 0.351       | 1162.87                  | 856.81                 |
| Curvedness       | -4.0000-0.4000  | 0.624       | 0.351       | 1162.87                  | 856.81                 |

Calculation of  $\Delta S$  and  $N$  for compound **1**.

$\Delta S$

$$= \int_{T_1}^{T_2} \frac{Q}{T} dT \approx \frac{\Delta H}{T_c} = \frac{35.54 \text{ J} \cdot \text{g}^{-1} \times 747.278 \text{ g} \cdot \text{mol}^{-1}}{400 \text{ K}} = \frac{26558.26 \text{ J} \cdot \text{mol}^{-1}}{400 \text{ K}}$$

$K^{-1}$

$\Delta S = R \ln N$

$$N = \exp\left(\frac{\Delta S}{R}\right) = \exp\left(\frac{67.08 \text{ J} \cdot \text{mol}^{-1} \cdot \text{K}^{-1}}{8.314 \text{ J} \cdot \text{mol}^{-1} \cdot \text{K}^{-1}}\right) = 3197.1$$
